# Supplementary material for: Arsenite Impairs BRCA1-Dependent DNA Double-Strand Break Repair, a Mechanism Potentially Contributing to Genomic Instability
Source: MDPI journal article supplement (doi:10.3390/ijms241814395), 2023-09-21
Supplement: s1 [file s1]

## Supplementary information to:

# Arsenite impairs BRCA1-dependent DNA double-strand break repair, a mechanism potentially contributing to genomic instability

Tizia Matthäus<sup>1</sup>, Sandra Stößer<sup>1</sup>, Hatice Yasemin Seren<sup>1</sup>, Vivien M. M. Haberland<sup>1</sup> and Andrea Hartwig<sup>1\*</sup>

<sup>1</sup> Department of Food Chemistry and Toxicology, Institute of Applied Biosciences (IAB), Karlsruhe Institute of Technology (KIT), Adenauerring 20a, 76131 Karlsruhe, Germany

\* Correspondence: andrea.hartwig@kit.edu (A.H.)

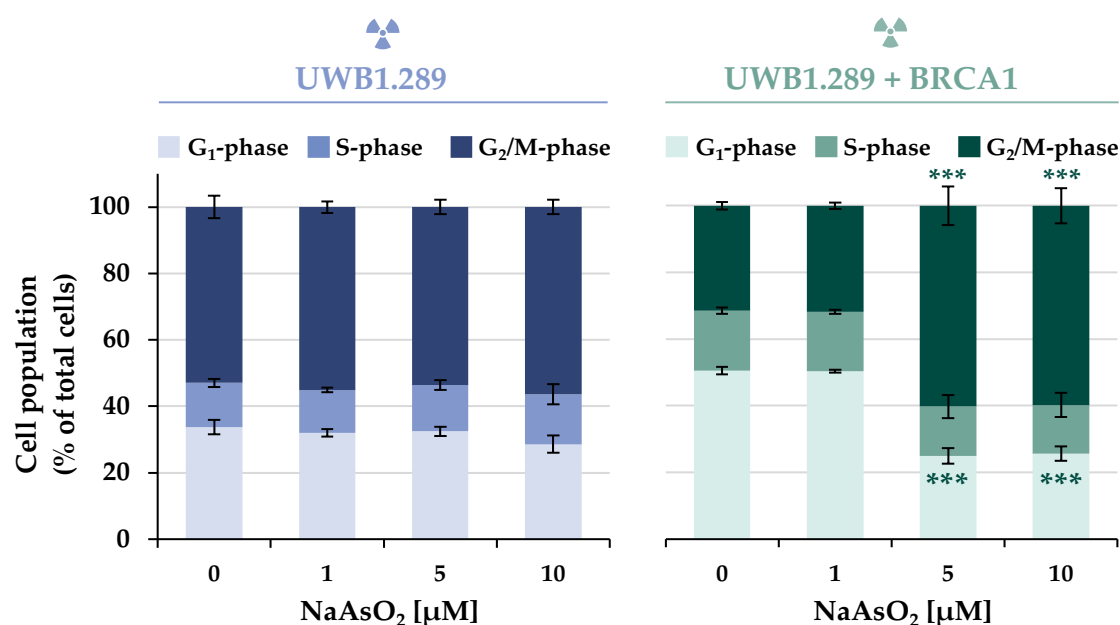

Figure S1: Cell cycle distribution of UWB1.289 and UWB1.289 + BRCA1 cells after treatment with NaAsO<sub>2</sub>. Cells were pre-incubated with NaAsO<sub>2</sub> for 18 h, irradiated with 1 Gy, and post-incubated with NaAsO<sub>2</sub> for 8 h. Cell cycle distribution was analyzed by DAPI staining using flow cytometry. Shown are mean values  $\pm$  standard deviations derived from three independent experiments. Statistically significant difference from control as determined by ANOVA followed by Dunnett's T post hoc test: \*\*\* $p \leq 0.001$ .

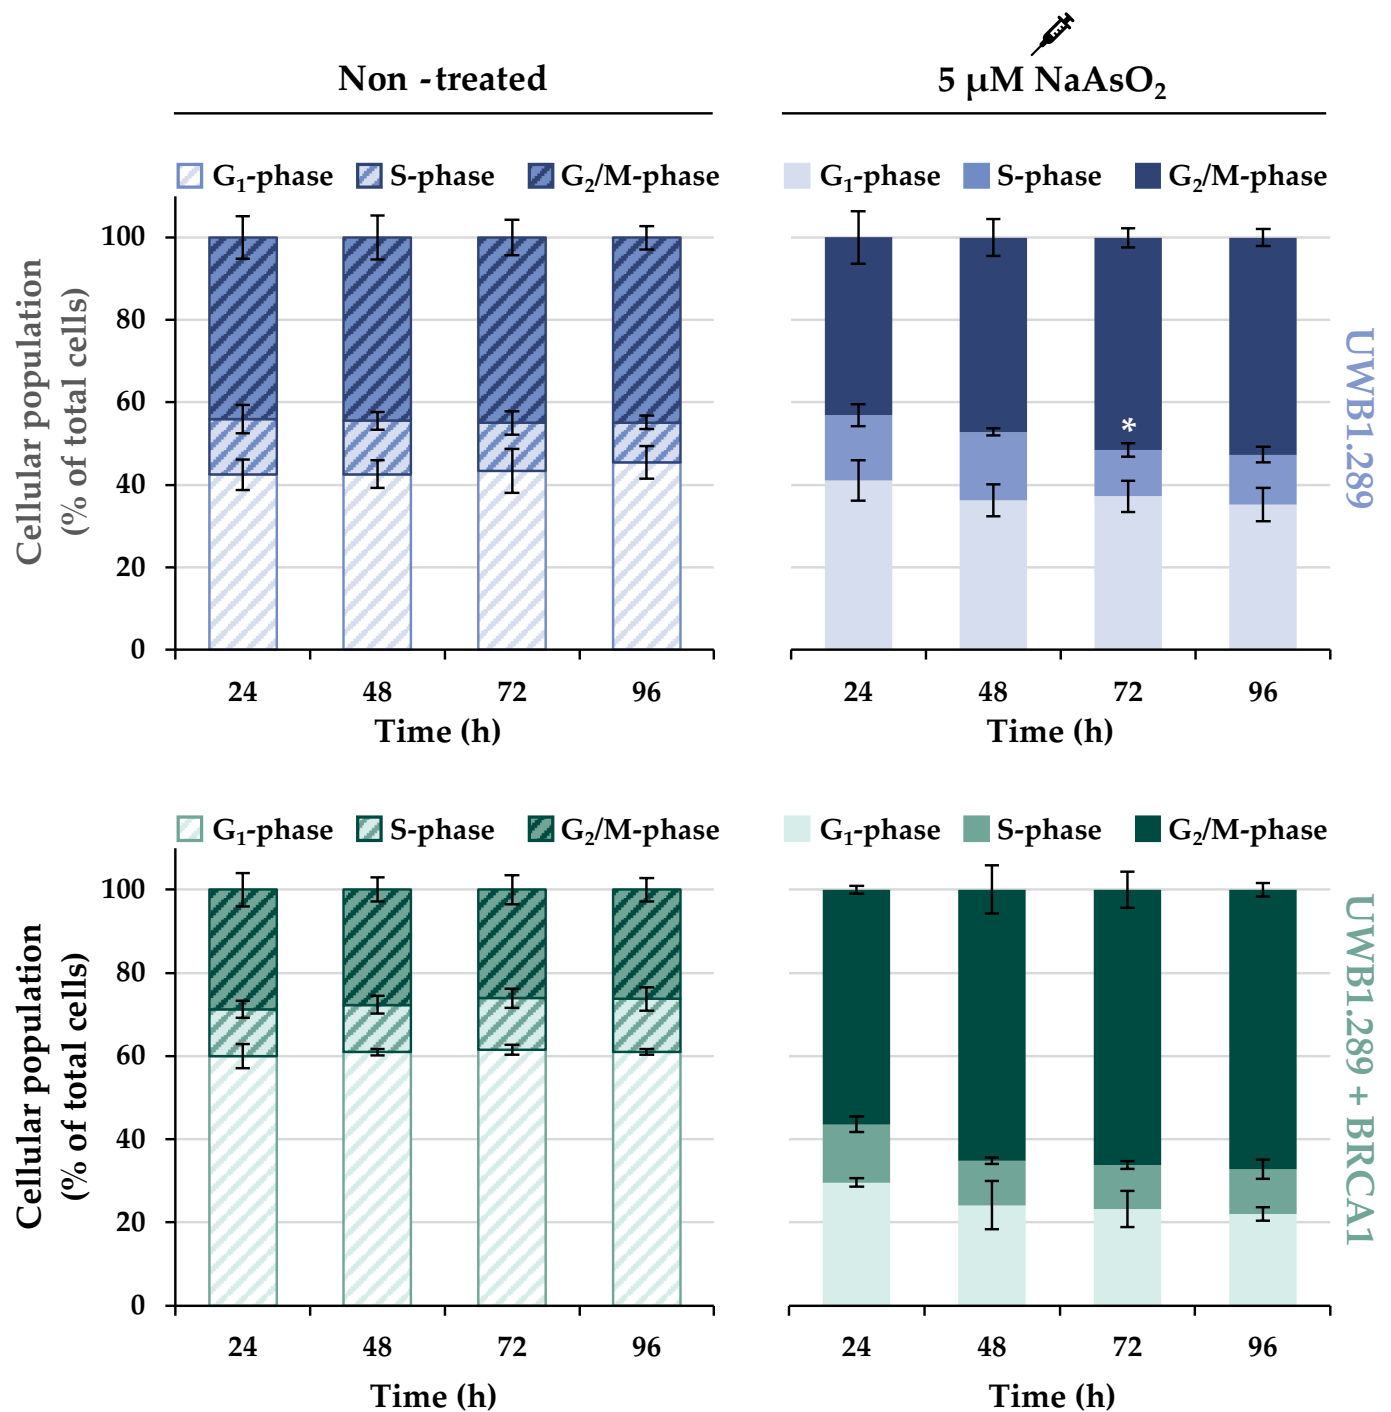

Figure S2: Time-dependent analysis of the cell cycle distribution of UWB1.289 and UWB1.289 + BRCA1 cells after treatment with NaAsO<sub>2</sub>. Cells were treated with 5  $\mu$ M NaAsO<sub>2</sub> and post-incubated for 24 h to 96 h. Cell cycle distribution was analyzed by DAPI staining using flow cytometry. Shown are mean values  $\pm$  standard deviations derived from three independent experiments. Statistically significant difference from control as determined by ANOVA followed by Dunnett's T post hoc test: \* $p \leq 0.05$ .

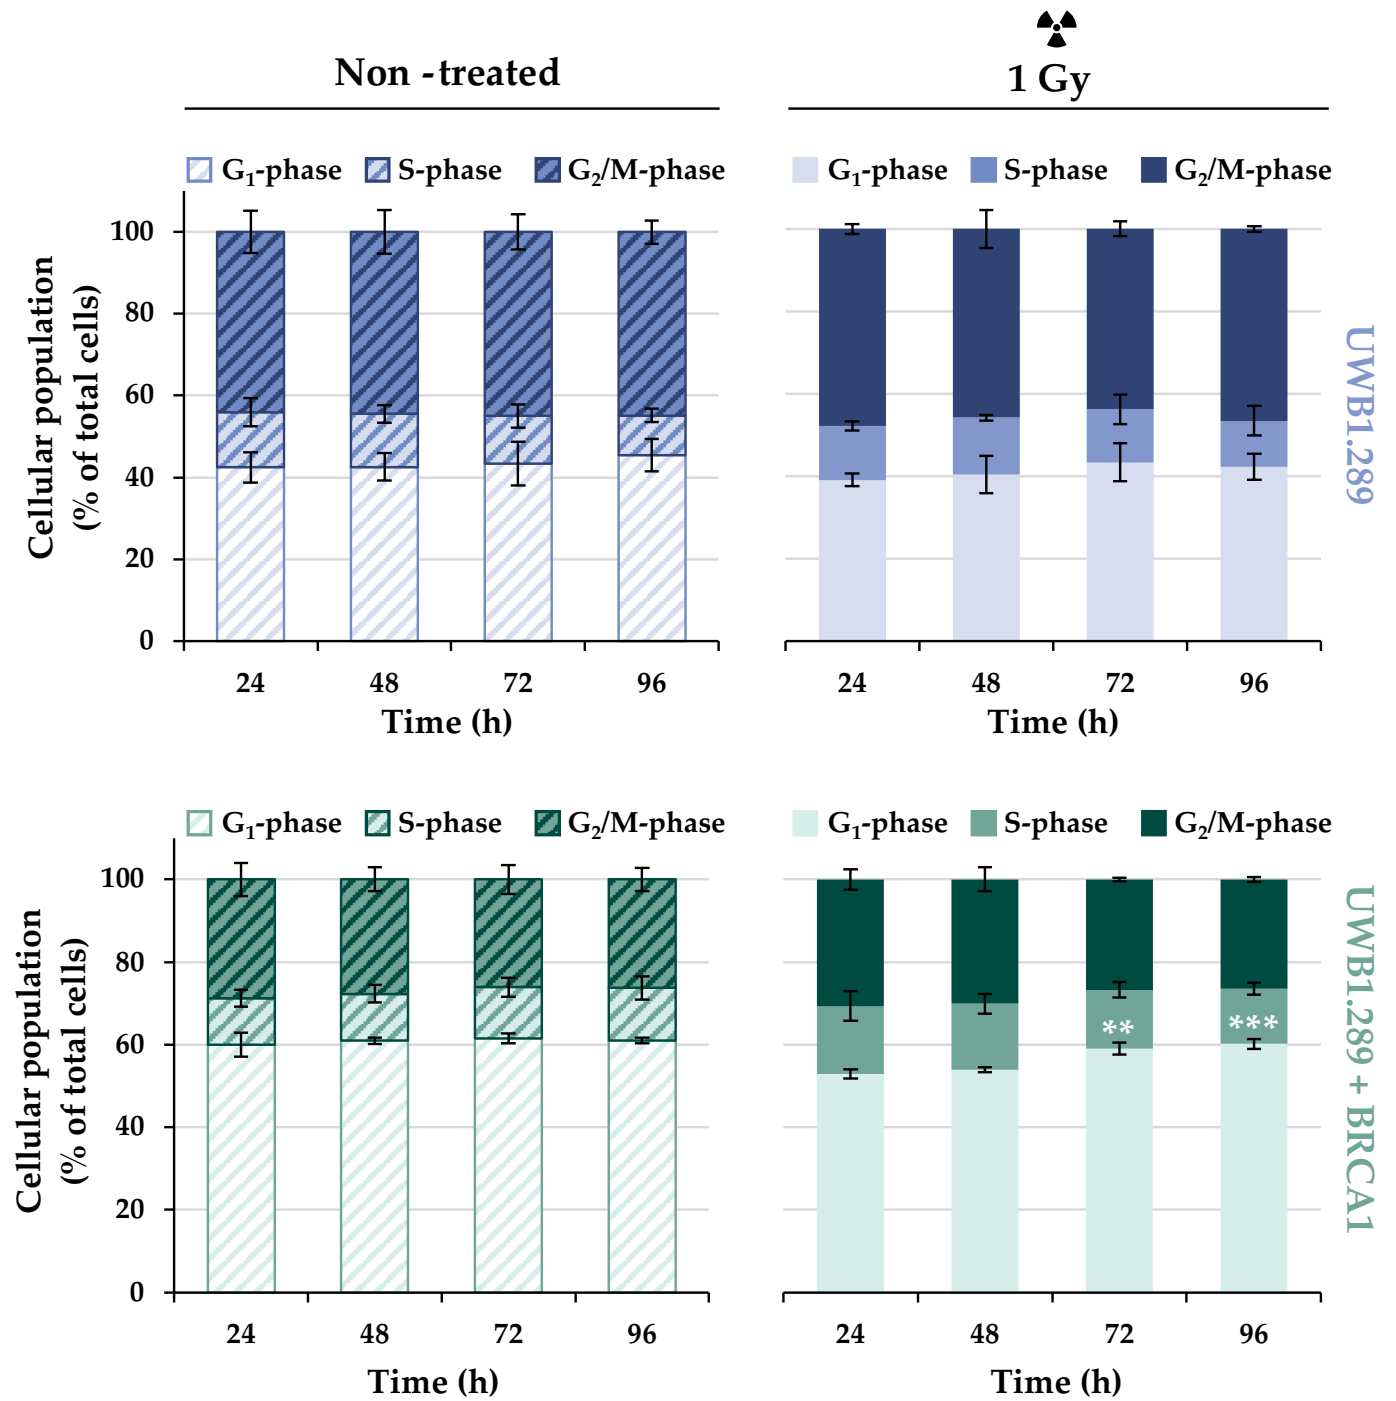

Figure S3: Time-dependent analysis of the cell cycle distribution of UWB1.289 and UWB1.289 + BRCA1 cells after exposure to IR. Cells were irradiated with 1 Gy and post-incubated for 24 h to 96 h. Cell cycle distribution was analyzed by DAPI staining using flow cytometry. Shown are mean values  $\pm$  standard deviations derived from three independent experiments. Statistically significant difference from control as determined by ANOVA followed by Dunnett's T post hoc test: \*\* $p \leq 0.01$ , \*\*\* $p \leq 0.001$ .

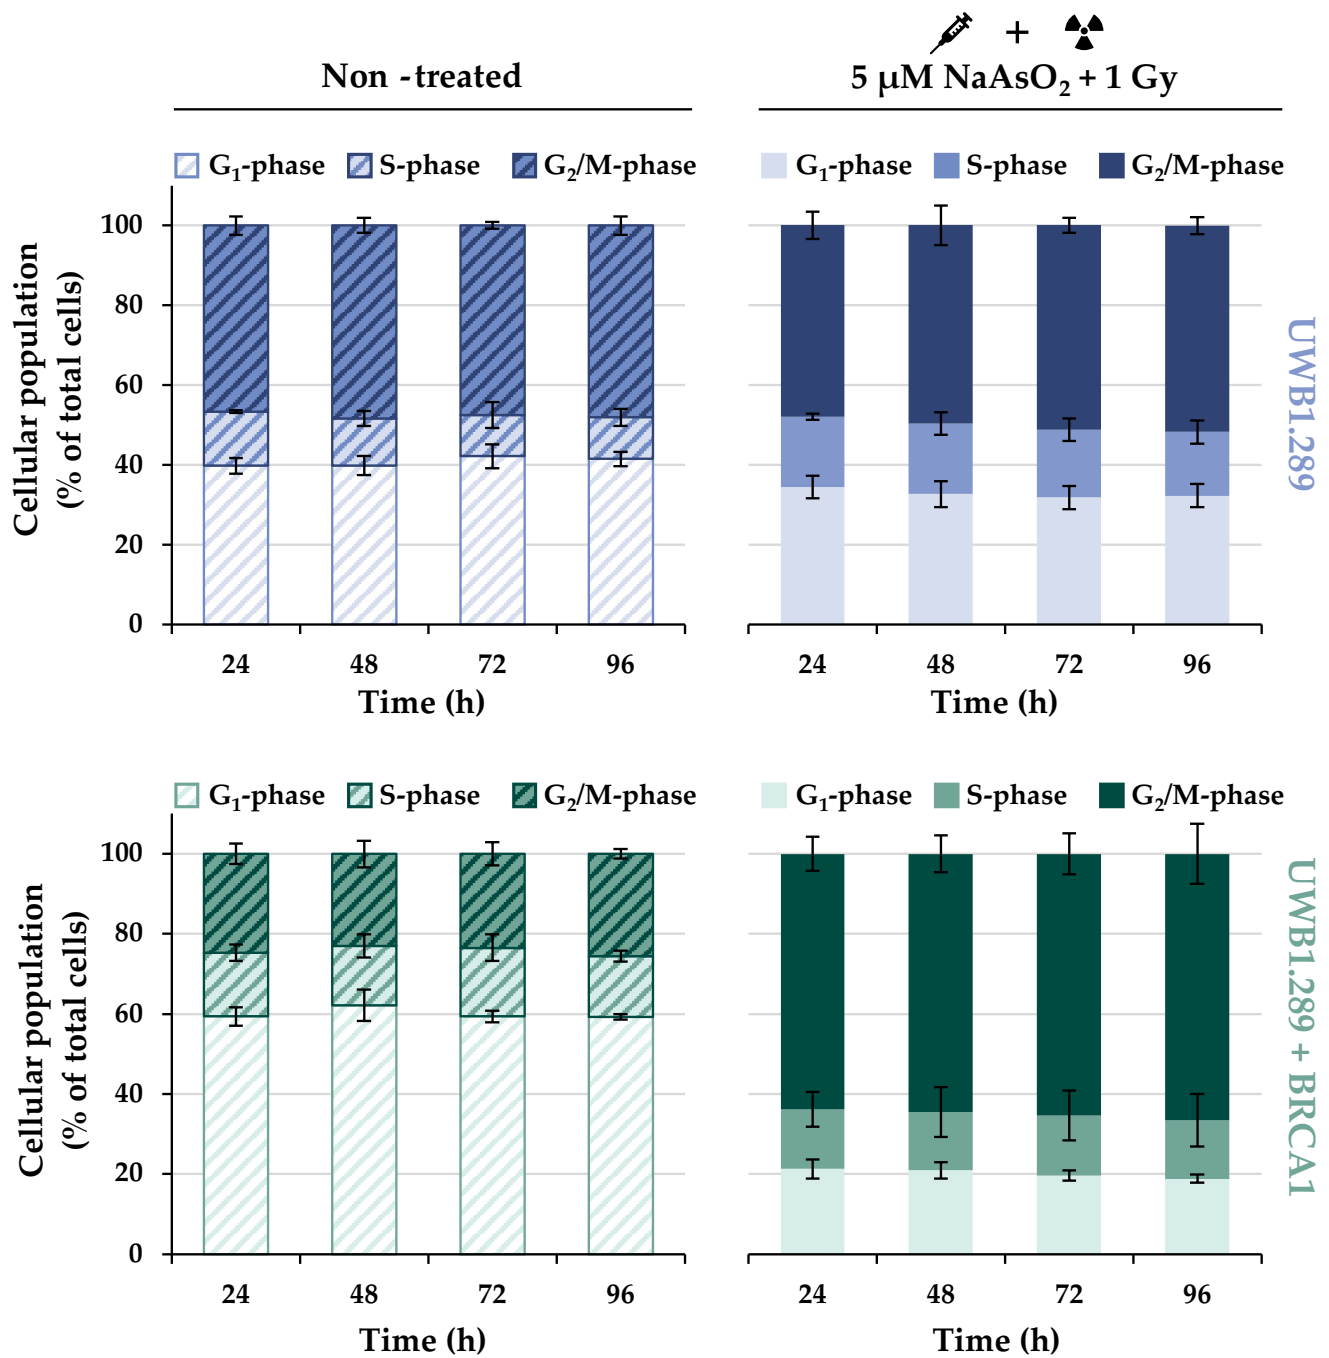

Figure S4: Time-dependent analysis of the cell cycle distribution of UWB1.289 and UWB1.289 + BRCA1 cells after co-exposure to NaAsO<sub>2</sub> and IR. Cells were pre-incubated with NaAsO<sub>2</sub> for 18 h, irradiated with 1 Gy, and post-incubated with NaAsO<sub>2</sub> for 24 h to 96 h. Cell cycle distribution was analyzed by DAPI staining using flow cytometry. Shown are mean values  $\pm$  standard deviations derived from three independent experiments. Statistically significant difference from control as determined by ANOVA followed by Dunnett's T post hoc test.



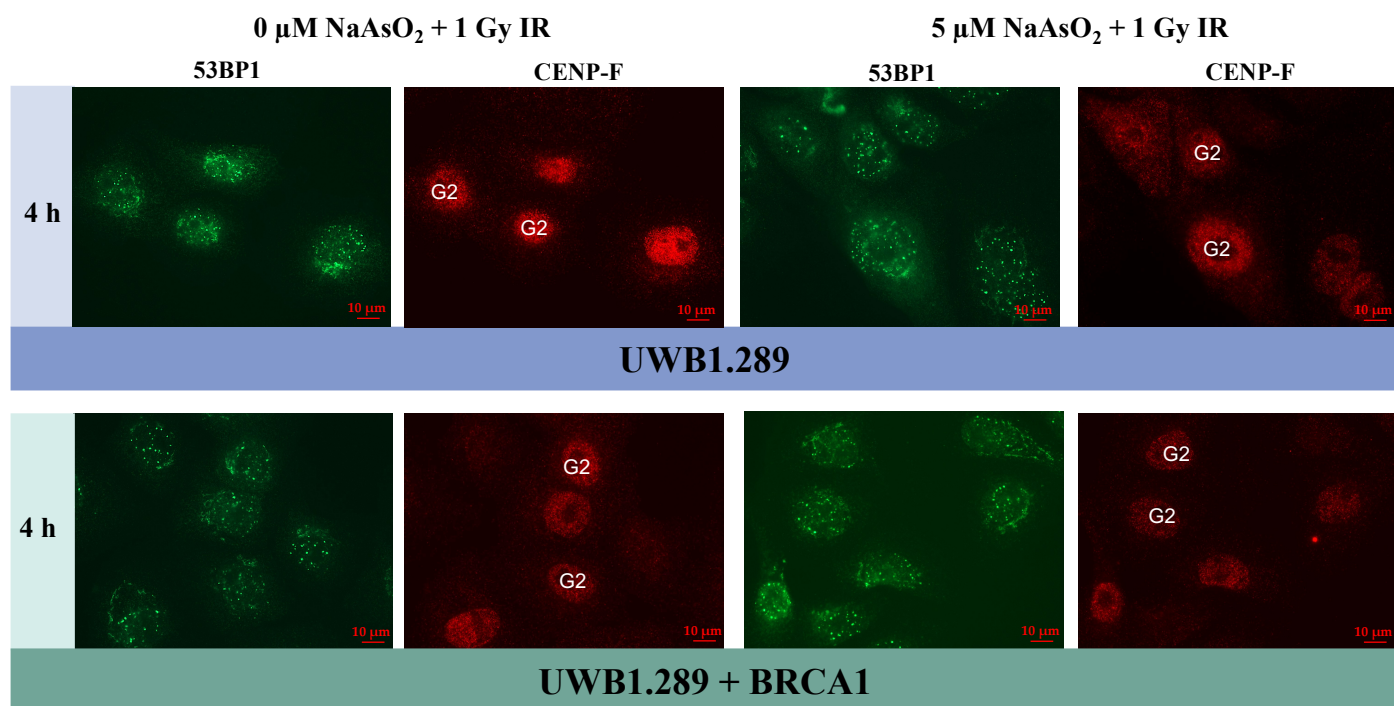

Figure S5: Impact on 53BP1 foci formation in UWB1.289 and UWB1.289 + BRCA1 cells after treatment with NaAsO<sub>2</sub>. Cells were pre-incubated with NaAsO<sub>2</sub> for 18 h, irradiated with 1 Gy, and post-incubated with NaAsO<sub>2</sub> 4 h. The cells were stained using specific primary and secondary antibodies against 53BP1, as well as CENP-F against the centromere protein F.

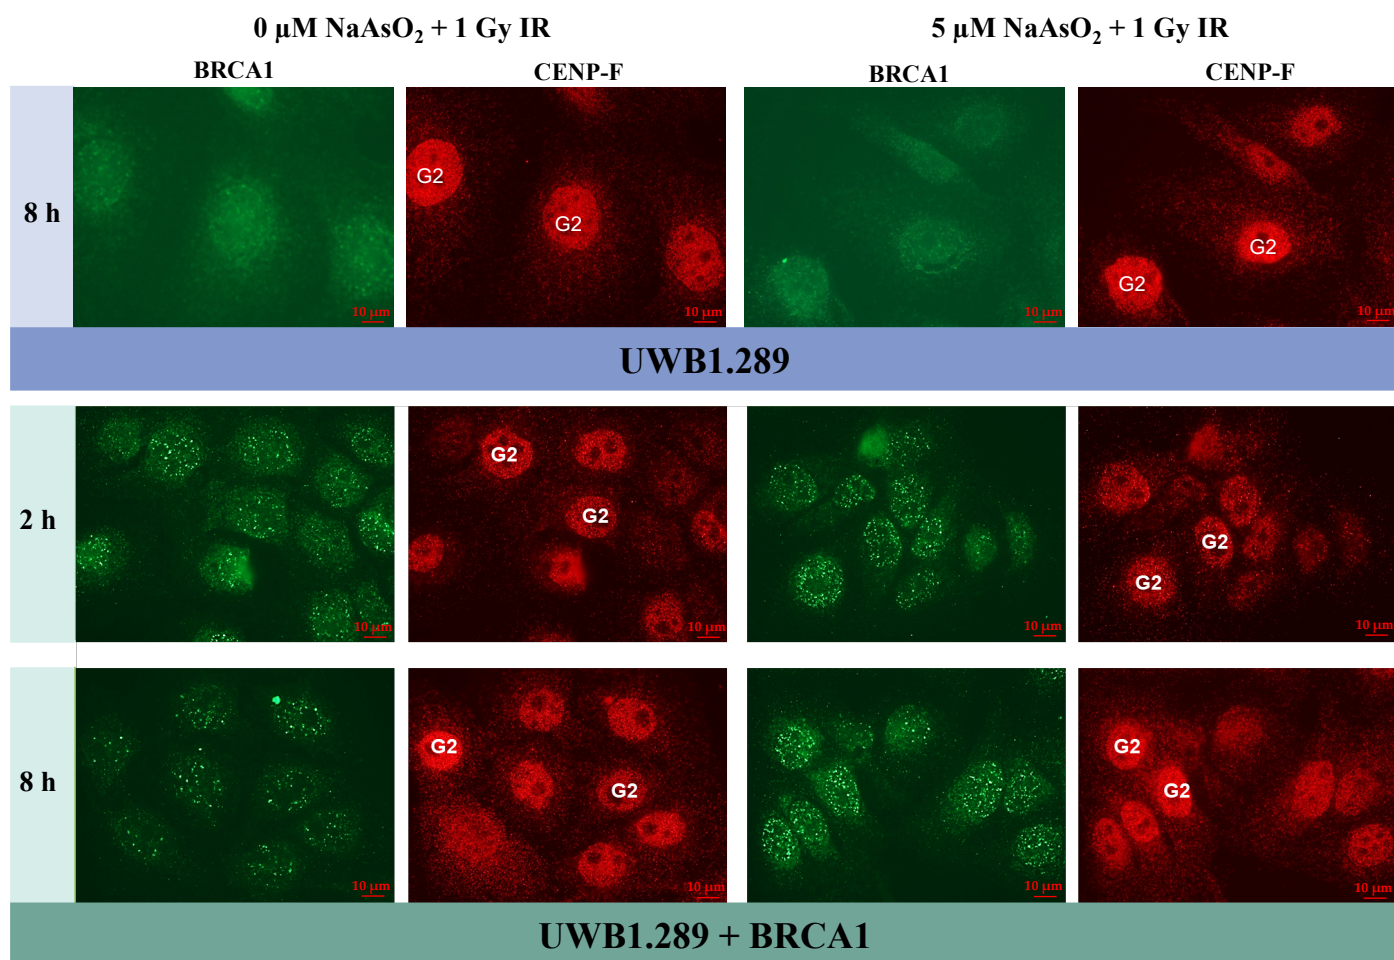

Figure S6: Impact on BRCA1 foci formation in UWB1.289 and UWB1.289 + BRCA1 cells after treatment with NaAsO<sub>2</sub>. Cells were pre-incubated with NaAsO<sub>2</sub> for 18 h, irradiated with 1 Gy, and post-incubated with NaAsO<sub>2</sub> 2 h and 8 h. The cells were stained using specific primary and secondary antibodies against 53BP1, as well as CENP-F against the centromere protein F.

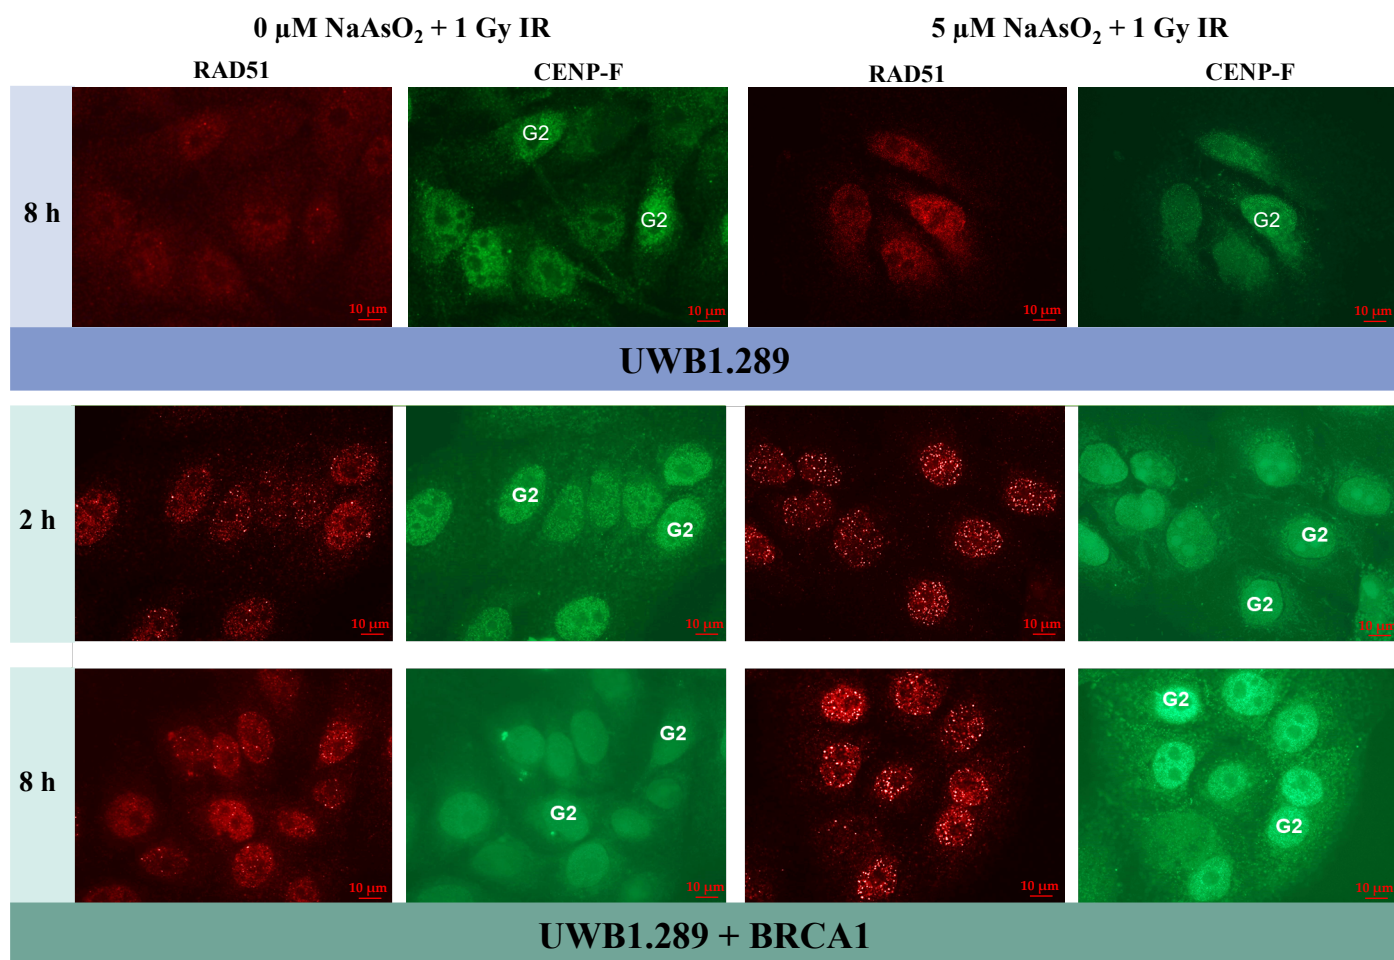

Figure S7: Impact on RAD51 foci formation in UWB1.289 and UWB1.289 + BRCA1 cells after treatment with NaAsO<sub>2</sub>. Cells were pre-incubated with NaAsO<sub>2</sub> for 18 h, irradiated with 1 Gy, and post-incubated with NaAsO<sub>2</sub> 2 h and 8 h. The cells were stained using specific primary and secondary antibodies against 53BP1, as well as CENP-F against the centromere protein F.



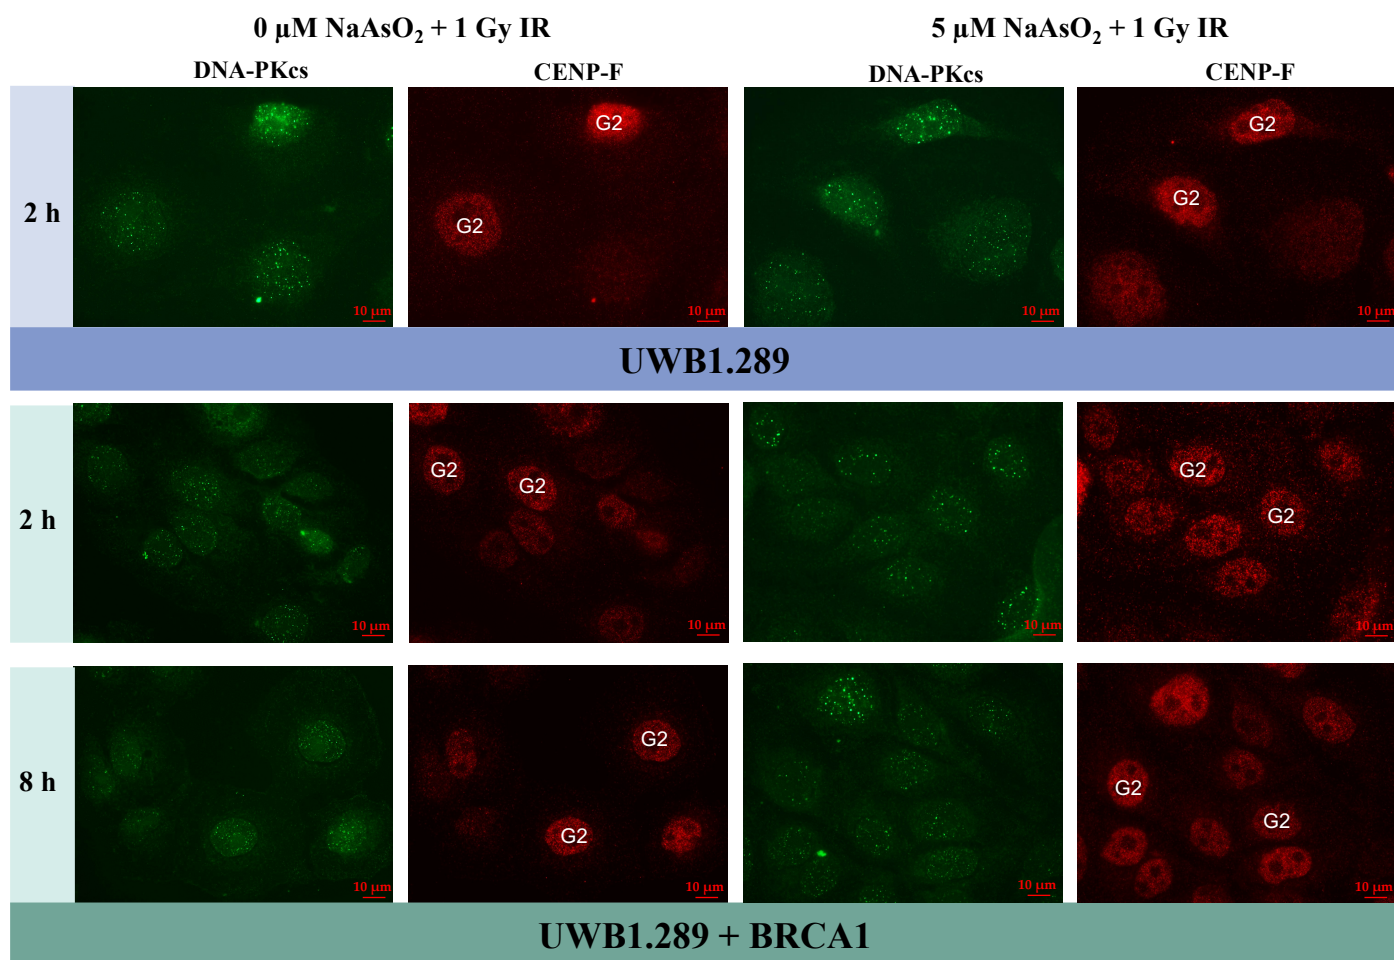

Figure S8: Impact on DNA-PKcs foci formation in UWB1.289 and UWB1.289 + BRCA1 cells after treatment with NaAsO<sub>2</sub>. Cells were pre-incubated with NaAsO<sub>2</sub> for 18 h, irradiated with 1 Gy, and post-incubated with NaAsO<sub>2</sub> 2 h and 8 h. The cells were stained using specific primary and secondary antibodies against DNA-PKcs, as well as CENP-F against the centromere protein F.

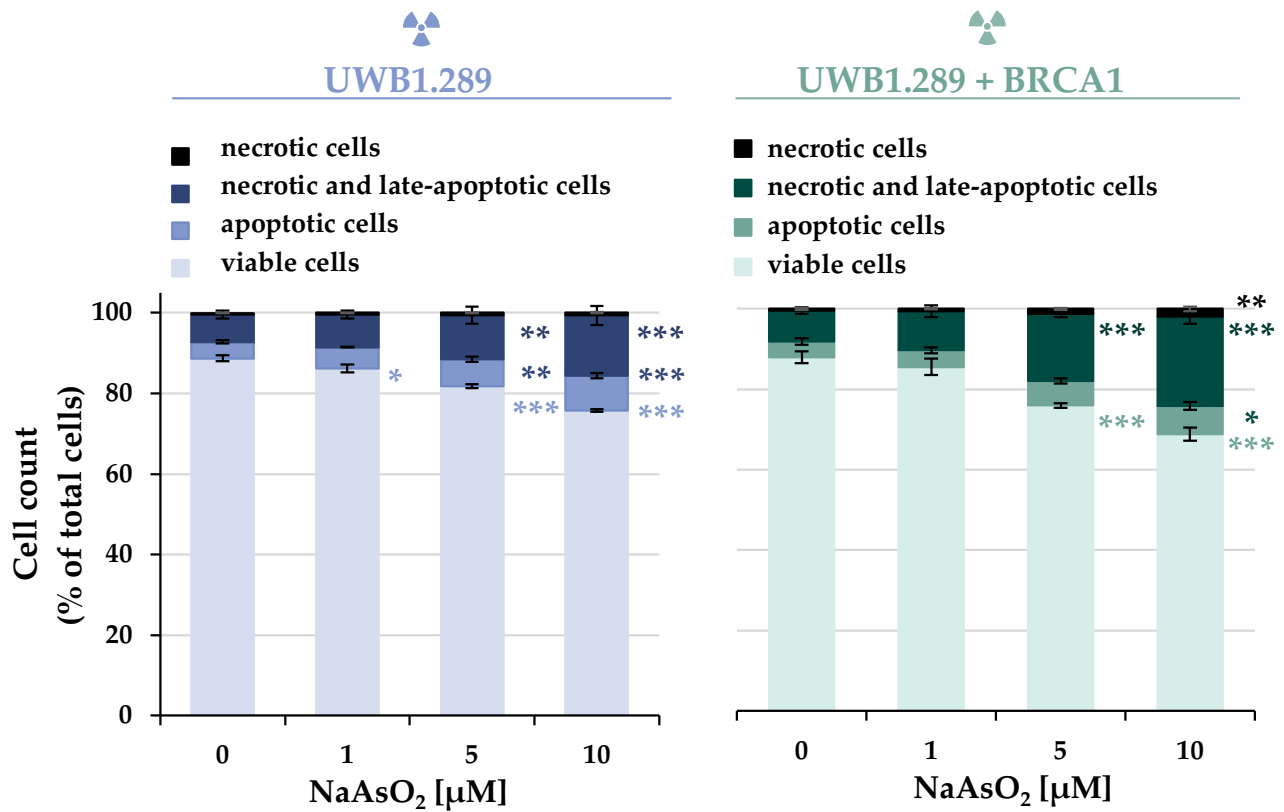

Figure S9: Analysis of apoptotic and necrotic cells after treatment with NaAsO<sub>2</sub>. Cells were pre-incubated with NaAsO<sub>2</sub> for 18 h, irradiated with 1 Gy, and post-incubated with NaAsO<sub>2</sub> for 8 h. To distinguish between necrotic, necrotic and late-apoptotic, apoptotic, and viable cells, cells were stained with Annexin V-FITC and propidium iodide (PI). Cell count was then analyzed using flow cytometry. Shown are mean values  $\pm$  standard deviations derived from three independent experiments. Statistically significant difference from control as determined by ANOVA followed by Dunnett's T post hoc test: \* $p \leq 0.05$ , \*\* $p \leq 0.01$ , \*\*\* $p \leq 0.001$ .
